# Supplementary material for: The Nutritional Quality of Organic and Conventional Food Products Sold in Italy: Results from the Food Labelling of Italian Products (FLIP) Study
Source: PubMed Central journal article supplement (PMC7282013; doi:10.3390/nu12051273), 2020-04-30
Supplement: nutrients-12-01273-s001.pdf [file nutrients-12-01273-s001.pdf]

Supplementary Table 1: Energy, macronutrients, and salt across the considered subcategories of products.

| Subcategory                     |              | Number   | Energy                 | Total fats          | Saturates           | Total Carbohydrates | Sugars              | Protein             | Salt                |
|---------------------------------|--------------|----------|------------------------|---------------------|---------------------|---------------------|---------------------|---------------------|---------------------|
|                                 |              | of Items | (kcal/100 g or 100 mL) | (g/100 g or 100 mL) | (g/100 g or 100 mL) | (g/100 g or 100 mL) | (g/100 g or 100 mL) | (g/100 g or 100 mL) | (g/100 g or 100 mL) |
| <i>Sweet cereal based-foods</i> |              |          |                        |                     |                     |                     |                     |                     |                     |
| <b>Cookies</b>                  | Conventional | 13       | 449 (427–460)          | 16.0 (10.8–18.0)    | 2.2 (1.7–3.4)       | 68.8 (63.1–76.0)    | 23.0 (21.0–24.0)    | 8.0 (7.1–8.9)       | 0.7 (0.6–0.8)       |
|                                 | Organic      | 13       | 453 (439–470)          | 16.0 (11.0–19.7)    | 2.4 (2.0–6.9)       | 65.0 (61.7–74.5)    | 21.0 (19.0–27.0)    | 8.4 (7.8–9.0)       | 0.6 (0.5–0.8)       |
| <b>Breakfast cereals</b>        | Conventional | 9        | 373 (371–415)          | 1.0 (0.9–14.0)      | 0.3 (0.3–6.0)       | 81.0 (65.0–82.0)    | 7.0 (6.0–21.0)      | 7.3 (7.2–8.0)       | 0.5 (0.4–1.5)       |
|                                 | Organic      | 9        | 375 (371–385)          | 1.0 (1.0–5.6)       | 0.3 (0.3–1.2)       | 81.0 (63.0–83.0)    | 6.1 (6.0–16.0)      | 8.0 (7.9–9.2)       | 0.1 (0.1–1.9)       |
| <b>Snacks</b>                   | Conventional | 6        | 383 (356–386)          | 14.0 (13.3–14.0)    | 2.5 (2.4–3.1)       | 59.2 (57.9–64.5)    | 33.5 (32.0–34.0)    | 5.4 (5.1–5.5)       | 0.6 (0.6–0.8)       |
|                                 | Organic      | 6        | 393 (381–403)          | 14.5 (12.8–15.2)    | 2.6 (2.6–3.1)       | 58.8 (55.1–64.1)    | 32.1 (31.0–35.0)    | 6.0 (5.9–6.1)       | 0.6 (0.6–0.8)       |
| <i>Bread and substitutes</i>    |              |          |                        |                     |                     |                     |                     |                     |                     |
| <b>Wraps</b>                    | Conventional | 11       | 304 (303–326)          | 8.6 (8.6–9.6)       | 1.5 (1.5–2.4)       | 47.1 (47.0–48.9)    | 1.1 (1.1–1.5)b      | 8.1 (7.9–8.1)       | 1.6 (1.6–1.7)a      |
|                                 | Organic      | 11       | 309 (305–311)          | 9.2 (8.6–9.6)       | 1.6 (0.8–1.9)       | 47.0 (45.9–48.6)    | 1.6 (1.2–2.1)a      | 8.2 (7.9–8.7)       | 1.5 (1.4–1.5)b      |
| <b>Crackers</b>                 | Conventional | 10       | 429 (424–431)          | 11.5 (11.0–12.3)    | 1.4 (1.1–1.7)       | 66.8 (65.5–69.9)    | 2.0 (2.0–2.0)a      | 11.1 (11.0–2.0)     | 1.8 (1.8–2.0)       |
|                                 | Organic      | 10       | 427 (426–438)          | 12.2 (12.0–13.0)    | 1.9 (1.9–2.1)       | 65.1 (63.0–68.0)    | 1.9 (1.6–2.0)b      | 12.0 (11.1–13.0)    | 2.0 (1.4–2.0)       |
| <b>Breadsticks</b>              | Conventional | 9        | 433 (415–451)          | 12.5 (8.0–16.0)     | 2.6 (1.3–4.1)       | 67.0 (62.3–71.0)    | 3.3 (1.9–3.5)       | 12.7 (12.2–13.0)    | 2.0 (1.8–2.1)       |
|                                 | Organic      | 9        | 436 (416–467)          | 11.6 (10.4–17.0)    | 2.0 (1.8–2.6)       | 65.0 (61.0–66.6)    | 2.4 (2.1–2.6)       | 13.0 (12.0–13.0)    | 1.9 (1.6–2.1)       |
| <b>Bread</b>                    | Conventional | 6        | 256 (252–268)          | 3.9 (3.3–4.6)       | 0.5 (0.4–0.7)       | 42.3 (32.0–46.1)    | 4.8 (4.6–4.9)       | 8.3 (8.2–8.6)       | 1.3 (1.2–1.5)       |
|                                 | Organic      | 6        | 254 (206–267)          | 4.2 (3.6–4.3)       | 0.5 (0.4–0.6)       | 44.8 (43.0–45.2)    | 3.1 (2.1–4.9)       | 9.0 (8.4–9.7)       | 1.3 (1.2–1.5)       |

|                                                 |              |    |                |                  |                  |                   |                 |                   |                |
|-------------------------------------------------|--------------|----|----------------|------------------|------------------|-------------------|-----------------|-------------------|----------------|
| <b>Rusks</b>                                    | Conventional | 6  | 399 (385–412)  | 7.6 (5.0–8.0)    | 1.0 (0.7–2.0)    | 72.1 (67.2–73.0)  | 7.0 (4.0–7.7)   | 10.4 (10.0–11.0)  | 1.2 (1.2–1.3)  |
|                                                 | Organic      | 6  | 395 (384–406)  | 5.7 (4.0–6.8)    | 0.8 (0.5–1.1)    | 70.3 (67.0–72.0)  | 5.5 (3.5–6.7)   | 12.3 (11.7–12.5)  | 1.3 (0.6–1.3)  |
| <hr/>                                           |              |    |                |                  |                  |                   |                 |                   |                |
| <i>Pasta, rice and other cereals</i>            |              |    |                |                  |                  |                   |                 |                   |                |
| <b>Pasta</b>                                    | Conventional | 77 | 354 (351–359)a | 1.5 (1.3–1.5)    | 0.3 (0.3–0.4)b   | 71.5 (69.2–73.1)a | 3.0 (2.9–3.2)   | 12.7 (12.5–13.0)a | 0.0 (0.0–0.0)a |
|                                                 | Organic      | 77 | 350 (347–354)b | 1.5 (1.3–2.0)    | 0.4 (0.3–0.5)a   | 71.0 (66.6–71.0)b | 3.2 (2.4–3.5)   | 11.5 (11.0–12.0)b | 0.0 (0.0–0.0)b |
| <b>Rice and other cereals</b>                   | Conventional | 12 | 354 (349–358)  | 1.2 (0.5–2.5)    | 0.2 (0.1–0.5)    | 70.5 (67.1–79.0)  | 0.4 (0.2–1.2)   | 9.3 (7.1–12.3)    | 0.0 (0.0–0.1)  |
|                                                 | Organic      | 12 | 350 (344–354)  | 1.5 (0.9–2.2)    | 0.4 (0.3–0.5)    | 75.0 (67.8–78.0)  | 0.5 (0.2–1.1)   | 7.5 (7.0–9.4)     | 0.0 (0.0–0.0)  |
| <b>Flour</b>                                    | Conventional | 12 | 339 (339–344)  | 1.0 (0.9–1.5)    | 0.2 (0.2–0.3)    | 72.0 (70.1–72.6)  | 1.0 (0.6–1.2)b  | 9.9 (9.0–10.8)    | 0.0 (0.0–0.0)  |
|                                                 | Organic      | 12 | 345 (340–353)  | 1.0 (0.7–1.1)    | 0.2 (0.2–0.3)    | 72.5 (71.0–73.0)  | 1.7 (1.2–1.8)a  | 10.8 (9.8–11.0)   | 0.0 (0.0–0.0)  |
| <b>Gnocchi</b>                                  | Conventional | 3  | 151 (123–156)  | 0.7 (0.4–1.4)    | 0.2 (0.0–0.2)    | 28.0 (24.5–32.6)  | 1.0 (0.1–4.7)   | 5.2 (3.5–5.4)     | 1.3 (1.3–1.4)  |
|                                                 | Organic      | 3  | 126 (121–159)  | 0.6 (0.6–2.0)    | 0.2 (0.2–0.2)    | 25.2 (24.0–29.0)  | 4.0 (1.0–4.4)   | 3.6 (3.5–5.3)     | 1.3 (1.2–1.3)  |
| <hr/>                                           |              |    |                |                  |                  |                   |                 |                   |                |
| <i>Milk, dairy foods and plant-based drinks</i> |              |    |                |                  |                  |                   |                 |                   |                |
| <b>Yogurt</b>                                   | Conventional | 46 | 96 (69–101)    | 3.4 (3.0–3.7)    | 2.4 (2.0–2.6)    | 12.9 (5.5–13.8)   | 12.0 (4.8–13.4) | 3.6 (3.4–3.9)     | 0.1 (0.1–0.1)b |
|                                                 | Organic      | 46 | 96 (71–103)    | 3.3 (3.2–3.9)    | 2.2 (2.1–2.6)    | 12.1 (5.2–15.0)   | 11.1 (4.5–14.0) | 3.6 (3.1–4.0)     | 0.1 (0.1–0.1)a |
| <b>Cheese</b>                                   | Conventional | 45 | 260 (216–285)  | 23.0 (16.0–28.0) | 16.0 (11.1–18.7) | 1.9 (1.0–2.8)     | 1.5 (0.3–2.3)   | 13.0 (8.0–17.0)   | 0.7 (0.6–0.8)  |
|                                                 | Organic      | 45 | 260 (232–289)  | 22.0 (18.0–28.0) | 15.8 (12.0–18.7) | 2.0 (0.7–2.9)     | 1.3 (0.2–2.3)   | 14.0 (9.4–17.0)   | 0.7 (0.5–0.8)  |
| <b>Milk</b>                                     | Conventional | 27 | 49 (47–65)     | 1.60 (1.6–3.6)   | 1.2 (1.1–2.6)    | 4.9 (4.9–5.0)     | 4.9 (4.9–5.0)   | 3.3 (3.2–3.4)     | 0.1 (0.1–0.1)  |
|                                                 | Organic      | 27 | 48 (47–65)     | 1.60 (1.6–3.6)   | 1.1 (1.0–2.5)    | 4.9 (4.9–5.0)     | 4.9 (4.9–5.0)   | 3.2 (3.2–3.3)     | 0.1 (0.1–0.1)  |
| <b>Plant-based drinks</b>                       | Conventional | 5  | 44 (42–45)a    | 2.0 (1.8–2.1)    | 0.3 (0.3–0.4)    | 3.0 (2.6–3.3)a    | 2.5 (2.4–2.8)a  | 3.3 (3.0–3.5)     | 0.0 (0.0–0.1)  |
|                                                 | Organic      | 5  | 39 (38–40)b    | 2.1 (2.0–2.1)    | 0.3 (0.3–0.4)    | 1.3 (0.9–1.6)b    | 0.8 (0.7–1.3)b  | 3.6 (3.5–3.8)     | 0.0 (0.0–0.1)  |

*Juices, nectars and tea*

---

|                                 |              |    |            |               |               |                  |                  |               |               |
|---------------------------------|--------------|----|------------|---------------|---------------|------------------|------------------|---------------|---------------|
| <b>Fruit juices and nectars</b> | Conventional | 52 | 58 (54–60) | 0.0 (0.0–0.0) | 0.0 (0.0–0.0) | 13.7 (12.5–14.3) | 13.2 (10.7–14.0) | 0.2 (0.1–0.4) | 0.0 (0.0–0.0) |
|                                 | Organic      | 52 | 57 (54–59) | 0.0 (0.0–0.0) | 0.0 (0.0–0.0) | 13.3 (12.4–14.0) | 13.0 (12.2–13.9) | 0.2 (0.2–0.4) | 0.0 (0.0–0.0) |
| <b>Ice tea</b>                  | Conventional | 2  | 20 (19–20) | 0.0 (0.0–0.0) | 0.0 (0.0–0.0) | 4.7 (4.6–4.8)    | 4.7 (4.6–4.8)    | 0.0 (0.0–0.0) | 0.0 (0.0–0.0) |
|                                 | Organic      | 2  | 2 (1–2)    | 0.0 (0.0–0.0) | 0.0 (0.0–0.0) | 0.1 (0.1–0.1)    | 0.1 (0.0–0.1)    | 0.0 (0.0–0.0) | 0.0 (0.0–0.0) |

---

*Jams, chocolate spreads and honey*

---

|                          |              |    |                |                  |                 |                   |                   |                |               |
|--------------------------|--------------|----|----------------|------------------|-----------------|-------------------|-------------------|----------------|---------------|
| <b>Jam and jelly</b>     | Conventional | 44 | 190 (187–211)a | 0.1 (0.0–0.2)    | 0.0 (0.0–0.0)   | 45.0 (44.0–52.0)a | 44.0 (43.0–50.5)a | 0.4 (0.0–0.5)b | 0.1 (0.0–0.1) |
|                          | Organic      | 44 | 166 (158–169)b | 0.1 (0.0–0.3)    | 0.0 (0.0–0.0)   | 39.0 (37.5–40.0)b | 36.0 (35.0–38.0)b | 0.5 (0.3–0.6)a | 0.1 (0.1–0.1) |
| <b>Honey</b>             | Conventional | 14 | 321 (320–326)  | 0.0 (0.0–0.0)    | 0.0 (0.0–0.0)   | 80.0 (80.0–80.0)  | 80.0 (80.0–80.0)  | 0.0 (0.0–0.4)  | 0.0 (0.0–0.0) |
|                          | Organic      | 14 | 322 (322–331)  | 0.0 (0.0–0.0)    | 0.0 (0.0–0.0)   | 80.0 (80.0–80.0)  | 80.0 (80.0–80.0)  | 0.6 (0.0–0.6)  | 0.0 (0.0–0.0) |
| <b>Chocolate spreads</b> | Conventional | 3  | 525 (522–528)  | 29.0 (28.0–29.2) | 10.0 (5.1–10.0) | 59.0 (58.40–60.0) | 58.0 (57.0–59.0)  | 5.4 (3.0–6.1)  | 0.1 (0.1–0.1) |
|                          | Organic      | 3  | 519 (519–542)  | 27.0 (26.8–31.4) | 5.2 (5.2–8.6)   | 58.7 (54.4–59.0)  | 55.9 (51.6–56.0)  | 8.7 (8.5–8.7)  | 0.2 (0.2–0.2) |

---

*Fruit and vegetable-based foods*

---

|                            |              |    |               |                 |               |                 |                |                 |               |
|----------------------------|--------------|----|---------------|-----------------|---------------|-----------------|----------------|-----------------|---------------|
| <b>Tomato based-sauces</b> | Conventional | 21 | 30 (27–59)    | 0.2 (0.1–2.7)   | 0.0 (0.0–0.4) | 5.1 (4.3–6.0)   | 4.0 (3.7–4.5)  | 1.4 (1.2–1.7)   | 0.4 (0.0–1.0) |
|                            | Organic      | 21 | 31 (27–66)    | 0.2 (0.1–3.4)   | 0.0 (0.0–0.6) | 5.5 (4.5–6.3)   | 3.9 (3.6–4.4)  | 1.3 (1.2–1.6)   | 0.1 (0.0–0.8) |
| <b>Dried fruit</b>         | Conventional | 15 | 584 (328–614) | 48.0 (0.5–53.0) | 3.9 (0.0–5.6) | 12.0 (8.8–72.0) | 4.6 (3.9–59.2) | 18.1 (1.9–21.0) | 0.1 (0.0–0.1) |
|                            | Organic      | 15 | 585 (340–627) | 48.0 (0.5–55.0) | 4.6 (0.1–5.5) | 12.0 (5.1–72.0) | 4.5 (3.7–59.0) | 18.0 (2.4–21.0) | 0.0 (0.0–0.0) |
| <b>Frozen vegetables</b>   | Conventional | 15 | 38 (33–56)    | 0.5 (0.3–0.7)   | 0.1 (0.0–0.1) | 5.0 (2.9–8.2)   | 1.7 (0.4–2.5)  | 2.9 (2.7–3.5)   | 0.1 (0.0–0.1) |
|                            | Organic      | 15 | 35 (30–56)    | 0.4 (0.3–0.7)   | 0.0 (0.0–0.1) | 4.5 (2.8–7.6)   | 0.5 (0.2–2.8)  | 3.0 (2.2–3.4)   | 0.1 (0.0–0.1) |

---

| <i>Legumes</i>                            |              |    |               |                  |                  |                  |                |                  |               |
|-------------------------------------------|--------------|----|---------------|------------------|------------------|------------------|----------------|------------------|---------------|
| <b>Dried legumes</b>                      | Conventional | 21 | 332 (309–347) | 1.6 (1.2–2.0)    | 0.3 (0.1–0.4)    | 46.9 (37.0–51.8) | 2.5 (1.8–3.7)  | 22.0 (19.5–23.6) | 0.3 (0.2–0.5) |
|                                           | Organic      | 21 | 316 (292–355) | 1.6 (1.0–2.5)    | 0.2 (0.1–0.5)    | 45.4 (41.7–49.3) | 2.4 (1.3–3.5)  | 21.0 (20.0–23.0) | 0.2 (0.1–0.3) |
| <b>Canned and frozen legumes</b>          | Conventional | 34 | 95 (83–112)   | 0.5 (0.5–1.8)    | 0.1 (0.1–0.3)    | 13.2 (12.1–15.8) | 0.7 (0.6–1.0)  | 6.2 (5.5–7.0)    | 0.8 (0.7–1.0) |
|                                           | Organic      | 34 | 92 (80–97)    | 0.6 (0.4–1.7)    | 0.1 (0.1–0.2)    | 12.9 (10.8–14.2) | 0.7 (0.3–1.3)  | 6.2 (5.4–6.9)    | 0.7 (0.6–0.9) |
| <i>Oils, fats and dressings</i>           |              |    |               |                  |                  |                  |                |                  |               |
| <b>Olive oil and other vegetable oils</b> | Conventional | 32 | 824 (822–827) | 91.8 (91.6–92.0) | 13.5 (13.0–14.1) | 0.0 (0.0–0.0)    | 0.0 (0.0–0.0)  | 0.0 (0.0–0.0)    | 0.0 (0.0–0.0) |
|                                           | Organic      | 32 | 824 (824–828) | 91.6 (91.6–92.0) | 13.9 (13.0–14.0) | 0.0 (0.0–0.0)    | 0.0 (0.0–0.0)  | 0.0 (0.0–0.0)    | 0.0 (0.0–0.0) |
| <b>Animal fats and margarine</b>          | Conventional | 10 | 752 (747–754) | 83.0 (83.0–83.0) | 57.6 (53.0–58.0) | 0.4 (0.0–0.7)    | 0.3 (0.0–0.7)  | 0.5 (0.0–0.6)    | 0.0 (0.0–0.1) |
|                                           | Organic      | 10 | 750 (739–754) | 83.0 (82.0–83.0) | 58.0 (56.0–59.2) | 0.1 (0.0–0.7)    | 0.1 (0.0–0.7)  | 0.2 (0.0–0.6)    | 0.0 (0.0–0.0) |
| <b>Vinegar</b>                            | Conventional | 9  | 25 (17–83)    | 0.0 (0.0–0.0)    | 0.0 (0.0–0.0)    | 0.5 (0.5–16.0)   | 0.5 (0.5–16.0) | 0.1 (0.1–0.1)    | 0.0 (0.0–0.1) |
|                                           | Organic      | 9  | 25 (17–178)   | 0.0 (0.0–0.0)    | 0.0 (0.0–0.0)    | 0.5 (0.1–39.0)   | 0.5 (0.1–39.0) | 0.1 (0.1–0.1)    | 0.0 (0.0–0.0) |

---

Values are expressed as median (25<sup>th</sup>–75<sup>th</sup> percentile). For each category, different letters in the same column indicate significant differences among conventional and organic products (Mann–Whitney non-parametric test for two independent samples),  $p < 0.05$ .
